# Supplementary material for: Investigation of the Velocities of Coals of Diverse Rank under Water- or Gas-Saturated Conditions for Application in Coalbed Methane Recovery
Source: Hindawi journal article supplement (doi:10.1155/2019/3729381), 2019-05-02
Supplement: f1 [file 3729381.f1.docx]

**Statement of supplementary material**

This statement is provided for the manuscript titled “**Investigation of the velocities of coals of diverse rank under water or gas saturated conditions for application in coalbed methane recovery**” accepted in Geofluids, which includes the description of all the abbreviations and the figures in the final manuscript. **First**, some abbreviations in the manuscript are described as follows:

1. “CBM” means coalbed methane.

2. “UPVp” and “UPVs” means the longitudinal ultrasonic pulse velocity and transverse pulse velocity of the coals, respectively.

3. “*Ro,max*” means the vitrinite reflectance that characterizes the coal rank.

4. “Mpre” and “Mwater” mean the masses of the dried cores and water saturated cores, respectively; “UPVp-gas” and “UPVs-gas” mean UPVp and UPVs of coals at the gas saturation, respectively; “UPVp-water” “UPVp-water” mean UPVp and UPVs of coals at the water saturation condition, respectively.

5. “Vr”, “Vr-water” and “Vr-gas” mean the velocity ratio of UPVp to UPVs, the velocity ratios under water saturation and gas saturation, respectively.

6. “AR” means the acoustic resistance of the material.

7. “*ρ*” means density that the ratio of the mass to the volume; “*φ*” means coal porosity and was calculated using the weighting method.

8. “Vcrack” and “Vcore” mean the volumes of cracks and cores, respectively; “*ρ*w” means the water density; “Δ*M*” means the mass difference between “Mwater” and “Mpre”; “D” and “h” mean the diameter and height of the coal cores, respectively.

9. “υd” and “Ed” are dynamic Poisson’s ratio and elastic modulus of material, respectively.

10. “J” and “*l*” are the drilled borehole depth and the movement distance of transducer, respectively.

**Second**, the provided figure files titles “Fig. 1 (No. 3729381)”, …, “Fig. 8 (No. 3729381)” present the figures in the manuscript, and each file corresponds with each figure, and they are explained concisely as follows:

1. File “Fig. 1 (No. 3729381)” shows the schematic diagram of operating principle for ultrasonic pulse velocity device;

2. File “Fig. 2 (No. 3729381)” shows the images of the selected 76 experimental cores from the over view and lateral view, also describes the test method of coal velocity.

3. File “Fig. 3 (No. 3729381)” shows box plots of UPVp and UPVs for different rank coals (lignite, bituminite and anthracite) at the water saturation and gas saturation conditions.

4. File “Fig. 4 (No. 3729381)” shows the velocity scatterplots and fitted correlations between UPVs and UPVp for lignite, bituminite and anthracite under the water saturation and gas saturation.

5. File “Fig. 5 (No. 3729381)” shows the relations between Vr and UPVs for lignite, bituminite and anthracite under water saturation and gas saturation, respectively.

6. File “Fig. 6 (No. 3729381)” shows the velocity scatterplot and the corresponding trends between UPVp and density for lignite, bituminite and anthracite under water saturation and gas saturation, respectively.

7. File “Fig. 7 (No. 3729381)” shows the scatterplot and linear relations between UPVp and porosity for lignite, bituminite and anthracite under water saturation and gas saturation, respectively, also shows a sketch of water transmission within the coal matrix.

8. File “Fig. 8 (No. 3729381)” shows the potential application of velocity measurements by hydraulic fracturing and CO2 fracturing during enhanced CBM recovery.

In addition, **all data supporting this study are provided as supplementary information accompanying this paper.** all the data are tested and recorded from some physical experiments dependent on the standard of “Calibrating Methods of Sonic Parameter Measuring Apparatus”(SL 120-2012), in which the experiment projects are collected from the Shengli coal mine, Inner Mongolia (lignite), the Datong coal mine, Shanxi (bituminite), and the Yangzhuang coal mine, Huaibei (anthracite), respectively.

The total data in the paper are listed as the following table:

**Parameter Data of lignite cores under water/gas saturated conditions**

| lignite  No. | Density | Porosity | water saturation (km/s) | | gas saturation (km/s) | |
| --- | --- | --- | --- | --- | --- | --- |
| (g/cm3) | UPVp | UPVs | UPVp | UPVs |
| 1 | 1.28694 | 3.31802 | 1.84075 | 1.3008 | 0.92038 | 0.69191 |
| 2 | 1.28972 | 3.70237 | 1.80774 | 1.52703 | 0.79182 | 0.62214 |
| 3 | 1.31496 | 2.00381 | 2.02354 | 1.58757 | 1.67466 | 1.22949 |
| 4 | 1.29001 | 3.3073 | 1.84389 | 1.68763 | 1.40239 | 1.11876 |
| 5 | 1.28297 | 2.37097 | 2.01255 | 1.71982 | 1.35129 | 1.051 |
| 6 | 1.35994 | 2.61845 | 2.03326 | 1.70055 | 1.06284 | 0.69281 |
| 7 | 1.30398 | 2.81163 | 1.74778 | 1.64778 | 1.47469 | 1.17975 |
| 8 | 1.28869 | 4.35034 | 1.68724 | 1.60426 | 0.86602 | 0.75277 |
| 9 | 1.33309 | 2.40376 | 1.75614 | 1.54 | 1.3 | 1.1 |
| 10 | 1.30203 | 2.98625 | 1.8326 | 1.43172 | 1.60754 | 1.06547 |
| 11 | 1.29586 | 2.62024 | 1.79357 | 1.70237 | 1.64656 | 1.05726 |
| 12 | 1.42207 | 2.64134 | 2.17643 | 1.87057 | 1.2188 | 0.78802 |
| 13 | 1.30566 | 3.46976 | 1.92712 | 1.57625 | 1.65377 | 1.18682 |
| 14 | 1.29337 | 4.1958 | 1.86 | 1.41141 | 0.83508 | 0.52193 |
| 15 | 1.28976 | 2.86283 | 2.01 | 1.674 | 0.77262 | 0.71743 |
| 16 | 1.27252 | 4.39126 | 1.92531 | 1.63525 | 1.5075 | 1.206 |
| 17 | 1.27633 | 1.96226 | 1.87093 | 1.25293 | 0.6126 | 0.44084 |
| 18 | 1.37859 | 1.01927 | 2.10867 | 1.76909 | 1.14707 | 0.69199 |
| 19 | 1.27738 | 3.66688 | 1.75741 | 1.55741 | 0.83246 | 0.67305 |
| 20 | 1.35982 | 1.27848 | 2.10271 | 1.74017 | 1.6279 | 1.14693 |
| 21 | 1.30158 | 2.4846 | 2.01234 | 1.78453 | 1.43303 | 0.98521 |
| 22 | 1.29591 | 4.28035 | 1.68069 | 1.46667 | 1.47697 | 1.01542 |
| 23 | 1.28819 | 4.76298 | 1.18395 | 1.12824 | 0.84867 | 0.70515 |
| 24 | 1.28304 | 3.99414 | 1.76035 | 1.39361 | 1.22366 | 0.84319 |

**Parameter Data of bituminite cores under water/gas saturated conditions**

| bituminite  No. | Density | Porosity | water saturation (km/s) | | gas saturation (km/s) | |
| --- | --- | --- | --- | --- | --- | --- |
| (g/cm3) | UPVp | UPVs | UPVp | UPVs |
| 1 | 1.44153 | 2.15587 | 2.12167 | 1.85164 | 1.47594 | 1.34 |
| 2 | 1.46874 | 1.86889 | 2.06449 | 1.686 | 1.77474 | 1.17628 |
| 3 | 1.35734 | 2.67744 | 1.80018 | 1.38742 | 1.0501 | 0.78147 |
| 4 | 1.36961 | 3.17079 | 1.98961 | 1.81196 | 0.70958 | 0.64222 |
| 5 | 1.43242 | 1.98427 | 1.86667 | 1.51642 | 1.23902 | 1.04742 |
| 6 | 1.28691 | 2.43144 | 1.7318 | 1.33671 | 1.56292 | 0.9584 |
| 7 | 1.38449 | 3.08533 | 1.69157 | 1.20917 | 1.47203 | 1.20917 |
| 8 | 1.42742 | 1.6971 | 1.87833 | 1.63597 | 1.74879 | 1.47 |
| 9 | 1.26025 | 2.85726 | 1.60508 | 1.04247 | 0.84975 | 0.65662 |
| 10 | 1.46351 | 1.72222 | 2.033 | 1.58671 | 0.99657 | 0.80675 |
| 11 | 1.3912 | 1.85052 | 1.8217 | 1.23561 | 1.06653 | 0.85864 |
| 12 | 1.39281 | 1.68735 | 1.87685 | 1.67741 | 1.19849 | 1.17235 |
| 13 | 1.40557 | 1.99508 | 1.9849 | 1.5109 | 1.15034 | 0.88026 |
| 14 | 1.35636 | 2.31632 | 1.95115 | 1.63645 | 0.85983 | 0.76286 |
| 15 | 1.44759 | 2.31614 | 2.0248 | 1.60698 | 1.68733 | 1.19106 |
| 16 | 1.46445 | 1.57218 | 1.95808 | 1.75127 | 1.85127 | 1.71821 |
| 17 | 1.50018 | 1.73994 | 2.06898 | 1.74793 | 1.71831 | 1.49088 |
| 18 | 1.39989 | 2.59798 | 1.9262 | 1.74672 | 0.88096 | 0.76173 |
| 19 | 1.48391 | 1.60267 | 2.07102 | 1.81214 | 1.56123 | 1.00475 |
| 20 | 1.42828 | 1.88459 | 2.0332 | 1.564 | 1.33763 | 1.0166 |
| 21 | 1.42932 | 1.67208 | 1.88148 | 1.34 | 1.66557 | 1.06947 |
| 22 | 1.56883 | 1.39392 | 2.17234 | 1.89074 | 1.70167 | 1.52388 |
| 23 | 1.43423 | 1.86696 | 1.99294 | 1.78316 | 1.0164 | 0.76421 |
| 24 | 1.40871 | 2.12038 | 1.95519 | 1.51746 | 0.7943 | 0.75311 |
| 25 | 1.55992 | 1.07053 | 2.15766 | 1.66246 | 1.69017 | 1.31701 |
| 26 | 1.45178 | 3.09578 | 1.93885 | 1.80036 | 1.80036 | 1.50478 |

**Parameter Data of anthracite cores under water/gas saturated conditions**

| anthracite  No. | Density | Porosity | water saturation (km/s) | | gas saturation (km/s) | |
| --- | --- | --- | --- | --- | --- | --- |
| (g/cm3) | UPVp | UPVs | UPVp | UPVs |
| 1 | 1.36436 | 1.01119 | 2.06429 | 1.80625 | 1.26438 | 0.9115 |
| 2 | 1.2851 | 1.48004 | 1.84444 | 1.56258 | 1.77579 | 1.446 |
| 3 | 1.49977 | 0.84664 | 2.1483 | 1.71136 | 1.94173 | 1.68283 |
| 4 | 1.43736 | 0.48806 | 2.06571 | 1.687 | 1.77579 | 1.3496 |
| 5 | 1.5113 | 0.33775 | 2.24933 | 1.86571 | 1.88471 | 1.48853 |
| 6 | 1.45265 | 0.98034 | 2.14702 | 1.8687 | 1.74058 | 1.40153 |
| 7 | 1.37206 | 0.90334 | 1.91075 | 1.71644 | 1.77667 | 1.58783 |
| 8 | 1.30164 | 2.97213 | 1.8075 | 1.43184 | 1.12467 | 0.73883 |
| 9 | 1.33397 | 1.41381 | 1.95481 | 1.75179 | 1.69417 | 1.45214 |
| 10 | 1.23006 | 2.18763 | 1.68317 | 1.27797 | 1.60302 | 1.34653 |
| 11 | 1.41323 | 1.28581 | 2.06612 | 1.68733 | 1.67857 | 1.21976 |
| 12 | 1.44925 | 1.02741 | 1.9326 | 1.51687 | 1.75224 | 1.20988 |
| 13 | 1.46529 | 0.50198 | 2.0214 | 1.63562 | 1.57316 | 1.07521 |
| 14 | 1.40253 | 0.70368 | 1.87286 | 1.43056 | 1.75121 | 1.33645 |
| 15 | 1.39003 | 1.69524 | 1.87148 | 1.63745 | 1.31288 | 0.84217 |
| 16 | 1.29198 | 2.0368 | 1.68517 | 1.38536 | 1.60492 | 1.18953 |
| 17 | 1.22765 | 2.11479 | 1.63097 | 1.33053 | 1.46551 | 1.1623 |
| 18 | 1.43814 | 1.1317 | 1.91358 | 1.67815 | 1.7793 | 1.49147 |
| 19 | 1.45741 | 0.57073 | 2.05571 | 1.61873 | 1.46719 | 1.08312 |
| 20 | 1.26733 | 1.84826 | 1.66656 | 1.32026 | 1.58844 | 1.09312 |
| 21 | 1.42974 | 1.32962 | 1.6268 | 1.26429 | 1.53452 | 1.00337 |
| 22 | 1.48451 | 0.34427 | 2.14915 | 1.74155 | 1.68059 | 1.14784 |
| 23 | 1.40227 | 1.2617 | 1.9254 | 1.48926 | 1.77667 | 1.25025 |
| 24 | 1.44232 | 0.62675 | 2.0258 | 1.58266 | 1.60875 | 1.20583 |
| 25 | 1.35065 | 1.04244 | 1.9951 | 1.72458 | 1.37464 | 0.90848 |
| 26 | 1.3352 | 1.34353 | 1.79821 | 1.46667 | 1.22805 | 0.95905 |

Corresponding author: Professor Cheng Zhai,

E-mail: greatzc@cumt.edu.cn
